# Supplementary material
Source: MDPI journal article supplement (https://www.mdpi.com/1424-2818/14/6/428)
Supplement: s1 [file s1]

## SUPPORTING INFORMATION

**Table S1** Photoperiods and temperatures across dates for which actual values were taken. In the experiment the overwintering was shortened comparing to what happens in nature, therefore post wintering dates do not follow the actual values in nature at particular timepoint.

| Date in the nature | Date in the experiment | Light | Dark                                                          | Reference temperature | Elevated temperature |
|--------------------|------------------------|-------|---------------------------------------------------------------|-----------------------|----------------------|
| 3 jul              |                        | 17:44 | 06:16                                                         | 21.1                  | 25.1                 |
| 10 jul             |                        | 17:33 | 06:27                                                         | 21.3                  | 25.3                 |
| 17 jul             |                        | 17:17 | 06:43                                                         | 22.2                  | 26.2                 |
| 24 jul             |                        | 16:58 | 07:02                                                         | 22.1                  | 26.1                 |
| 31 jul             |                        | 16:35 | 07:25                                                         | 22.1                  | 26.1                 |
| 7 aug              |                        | 16:12 | 07:48                                                         | 21.2                  | 25.2                 |
| 14 aug             |                        | 15:46 | 08:14                                                         | 21.6                  | 25.6                 |
| 21 aug             |                        | 15:21 | 08:39                                                         | 20.3                  | 24.3                 |
| 28 aug             |                        | 14:53 | 09:07                                                         | 18.4                  | 22.4                 |
| 4 sep              |                        | 14:27 | 09:33                                                         | 17.0                  | 21.0                 |
| 11 sep             |                        | 14:00 | 10:00                                                         | 15.3                  | 19.3                 |
| 18 sep             |                        | 13:33 | 10:27                                                         | 14.1                  | 18.1                 |
| 25 sep             |                        | 13:06 | 10:54                                                         | 13.5                  | 17.5                 |
| 2 oct              |                        | 12:41 | 11:19                                                         | 12.4                  | 16.4                 |
| 9 oct              |                        | 12:15 | 11:45                                                         | 10.4                  | 14.4                 |
| 16 oct             |                        | 11:50 | 12:10                                                         | 10                    | 14                   |
| 23 oct             |                        | 10:02 | 13:58                                                         | 10                    | 14                   |
| 30 oct             |                        | 10:02 | 13:58 (values for high temperature, in low complete darkness) | 6.9                   | 10.9                 |
| 6 nov              |                        | 00:00 | 24:00                                                         | 6                     | 10                   |
| 15 jan             |                        | 12:00 | 12:00                                                         | 10                    | 14                   |
| 22 jan             |                        | 13:00 | 11:00                                                         | 10                    | 14                   |
| 29 jan             |                        | 13:59 | 10:01                                                         | 10                    | 14                   |
| 5 feb              |                        | 15:20 | 08:40                                                         | 14                    | 18                   |
| 12 feb             | 30 apr                 | 15:47 | 08:13                                                         | 16.4                  | 20.4                 |
| 19 feb             | 7 may                  | 16:12 | 07:48                                                         | 17.6                  | 21.6                 |
| 26 feb             | 14 may                 | 16:37 | 07:23                                                         | 17.9                  | 21.9                 |
| 5 mar              | 21 may                 | 16:59 | 07:01                                                         | 18.2                  | 22.2                 |
| 12 mar             | 28 may                 | 17:18 | 06:42                                                         | 19.4                  | 23.4                 |
| 19 mar             | 4 jun                  | 17:34 | 06:26                                                         | 19.7                  | 23.7                 |
| 26 mar             | 11 jun                 | 17:45 | 06:15                                                         | 20.5                  | 24.5                 |
| 2 apr              | 18 jun                 | 17:51 | 06:09                                                         | 21.0                  | 25.0                 |
| 9 apr              | 25 jun                 | 17:52 | 06:08                                                         | 20.8                  | 24.8                 |
| 16 apr             | 2 jul                  | 17:47 | 06:13                                                         | 21.3                  | 25.3                 |
| 23 apr             | 9 jul                  | 17:37 | 06:23                                                         | 21.1                  | 25.1                 |
| 30 apr             | 16 jul                 | 17:22 | 06:38                                                         | 21.3                  | 25.3                 |
